# Supplementary material for: Photoassist-phosphorylated TiO2 as a catalyst for direct formation of 5-(hydroxymethyl)furfural from glucose
Source: Royal Society of Chemistry journal article supplement (doi:10.1039/c6cp06864b), 2016-12-24
Supplement: c6cp06864b1.pdf [file c6cp06864b1.pdf]

## Supporting information

### **Photoassist-phosphorylated TiO<sub>2</sub> as a catalyst for direct formation of 5-(hydroxymethyl)furfural from glucose**

Masashi Hattori,<sup>a</sup> Keigo Kamata,<sup>a</sup> and Michikazu Hara<sup>a,b,\*</sup>

<sup>a</sup>Laboratory for Materials and Structures, Institute of Innovative Research, Tokyo Institute of Technology, 4259-R3-33 Nagatsuta, Midori-ku, Yokohama 226-8503, Japan

<sup>b</sup>JST, Advanced Low Carbon Technology Research and Development Program (ALCA), 4-1-8 Honcho, Kawaguchi 332-0012, Japan

Corresponding author

\* E-mail: mhara@mssl.titech.ac.jp;

## Supplementary Figures

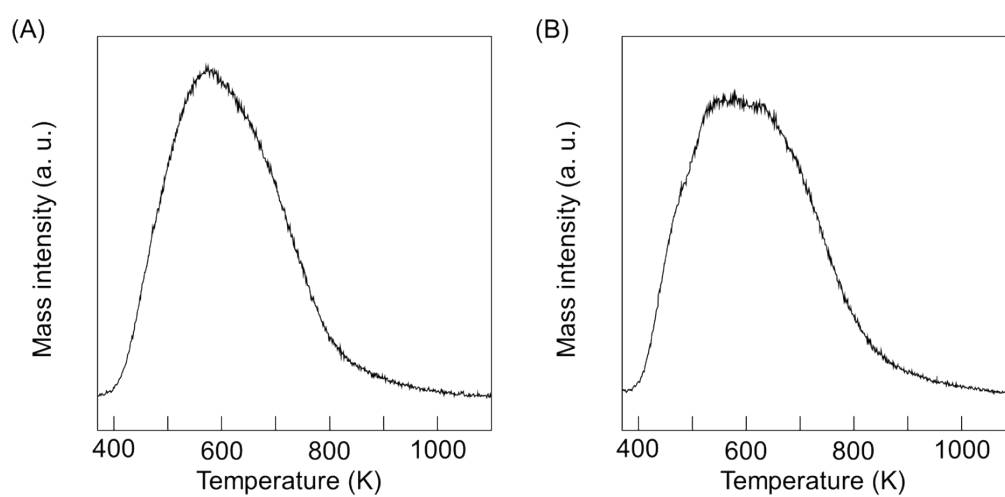

**Fig. S1**  $\text{NH}_3$ -TPD profiles for (A)  $\text{TiO}_2$  and (B)  $\text{P-TiO}_2$  prepared by immersing 5 days in 1 M  $\text{H}_3\text{PO}_4$  solution.

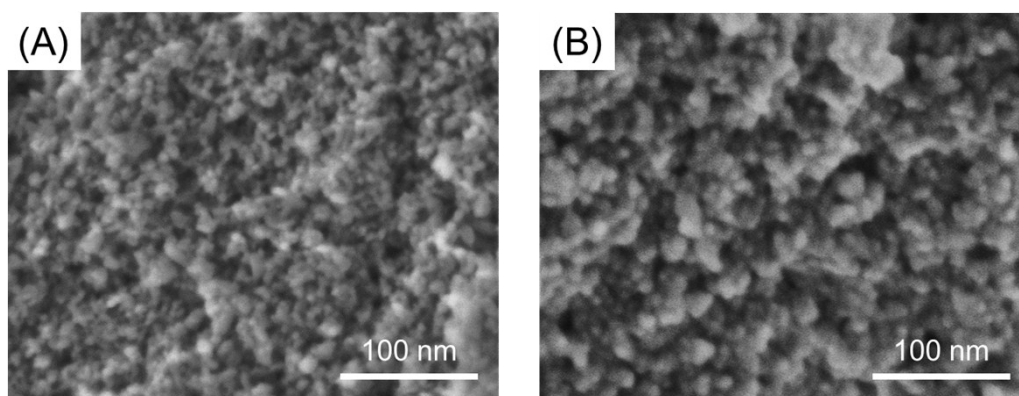

**Fig. S2** SEM images of (A)  $\text{TiO}_2$  and (B)  $\text{P-TiO}_2$  prepared by immersing 5 days in 1 M  $\text{H}_3\text{PO}_4$  solution.

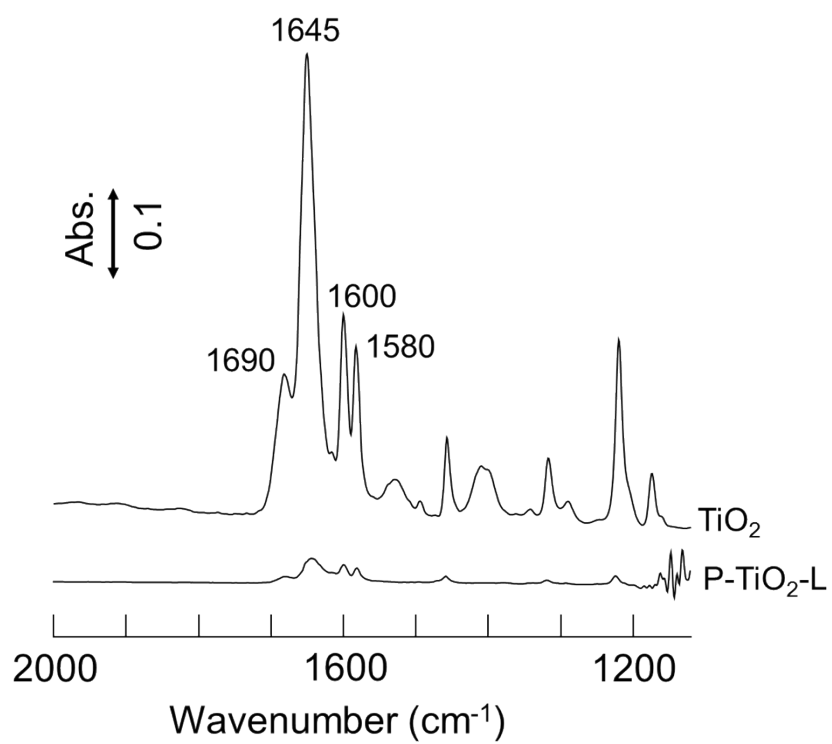

**Fig. S3** Difference FT-IR spectra of benzaldehyde-adsorbed catalysts at room temperature.
